# Supplementary material for: Integrated Transcriptome and Metabolome Analysis of Color Change and Low-Temperature Response during Flowering of Prunus mume
Source: MDPI journal article supplement (doi:10.3390/ijms232112831), 2022-10-24
Supplement: s1 [file s1]

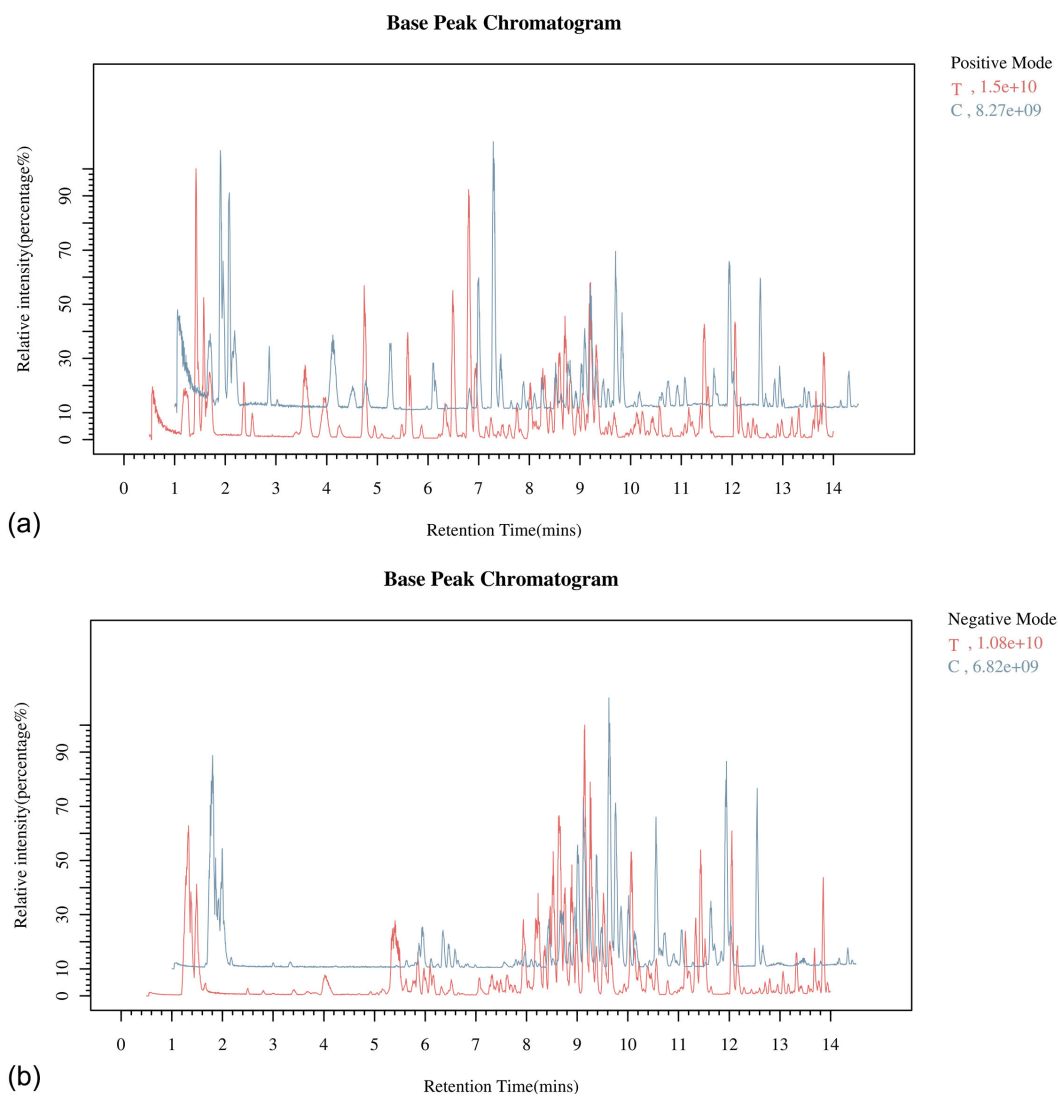

**Figure S1.** Representative base peak chromatogram of the control and treat groups in the positive ion mode (a) and negative ion mode (b). Blue represents CK group; Red represents treat group.

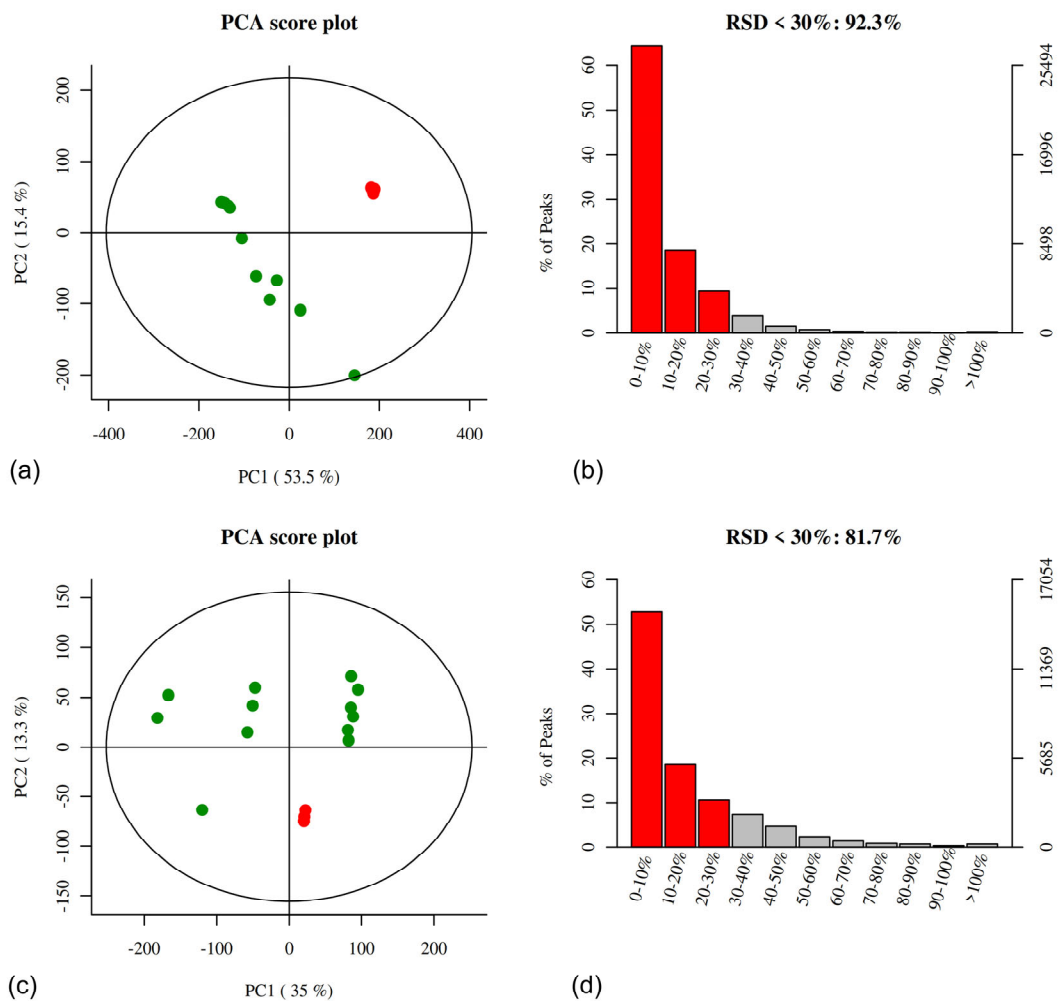

**Figure S2.** The PCA score plot of the metabolomic data (a,c), and distribution of the relative standard deviation (RSD) (b,d) under the positive ion mode and negative ion mode, respectively.
